# Supplementary material
Source: PubMed Central journal article supplement (PMC3714881)

## **Supporting material:**

### **Large uptake of titania and iron oxide nanoparticles in the nucleus of lung epithelial cells as measured by Raman imaging and multivariate classification**

Linnea Ahlinder,<sup>† ‡</sup> Barbro Ekstrand-Hammarström,<sup>‡</sup> Paul Geladi,<sup>§</sup> and Lars Österlund<sup>† \*</sup>

<sup>†</sup> Uppsala University, Department of Engineering Sciences, P.O. Box 534, SE-751 21 Uppsala, Sweden, <sup>‡</sup> FOI, Department for CBRN Defence and Security, Cementvägen 20, SE-901 82 Umeå, Sweden, <sup>§</sup> Swedish University of Agricultural Sciences, Unit of Biomass Technology and Chemistry, Linnaeus väg 6, SE-901 83 Umeå, Sweden

#### **Transmission electron micrographs of A549 cells exposed to TiO<sub>2</sub> nanoparticles for 48 h**

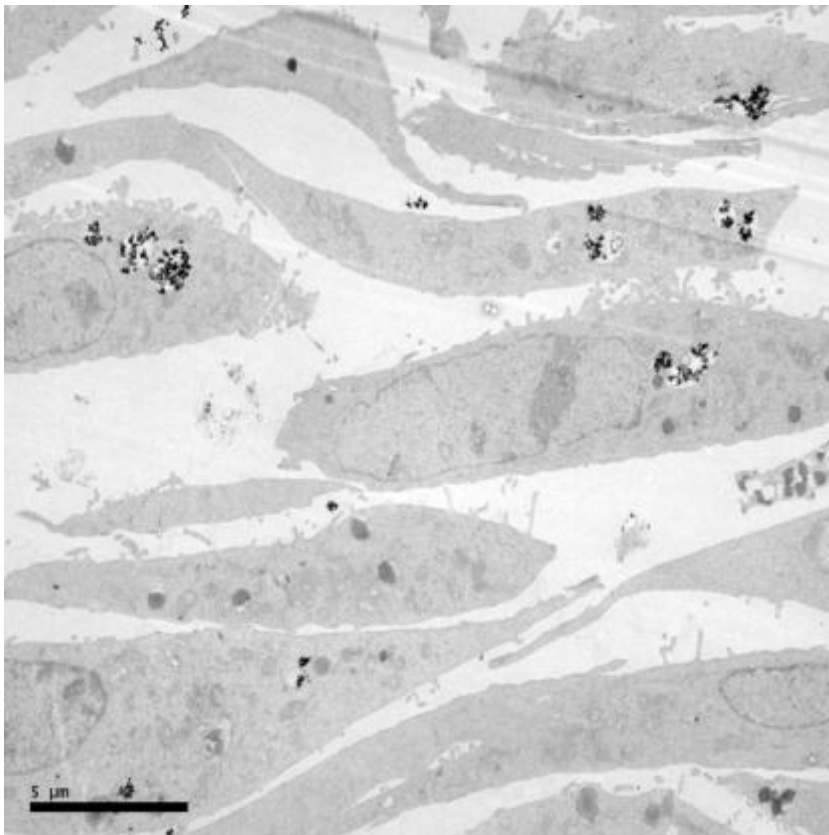

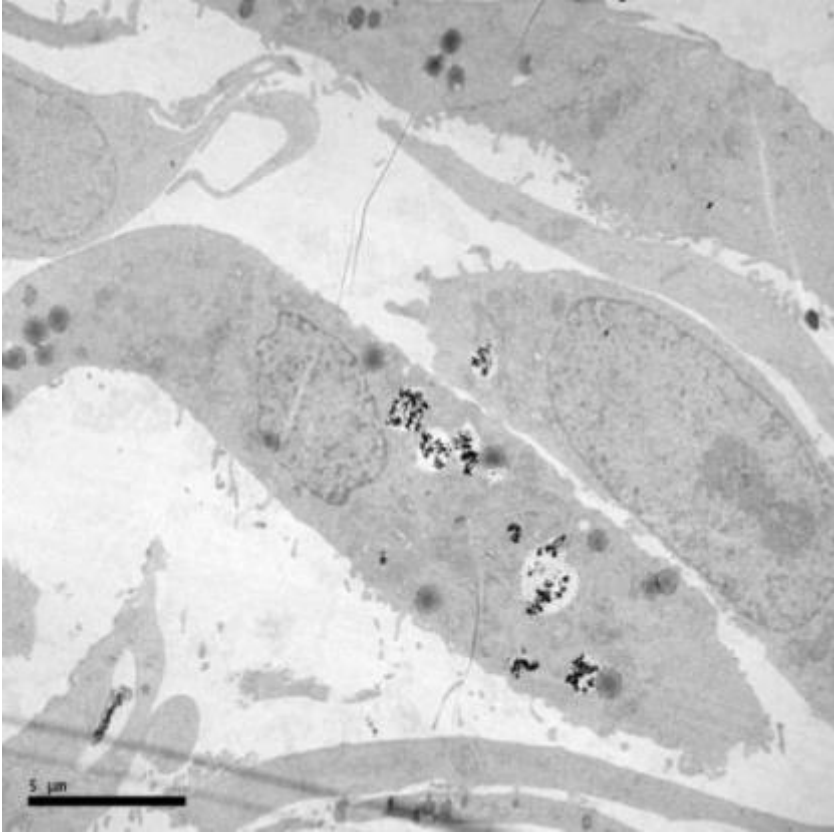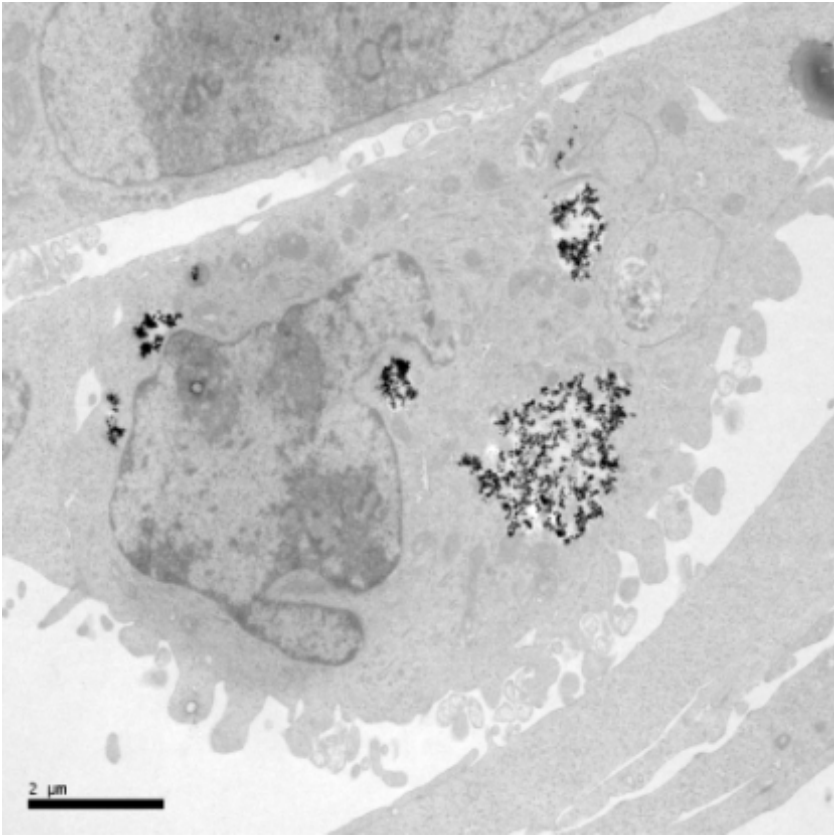

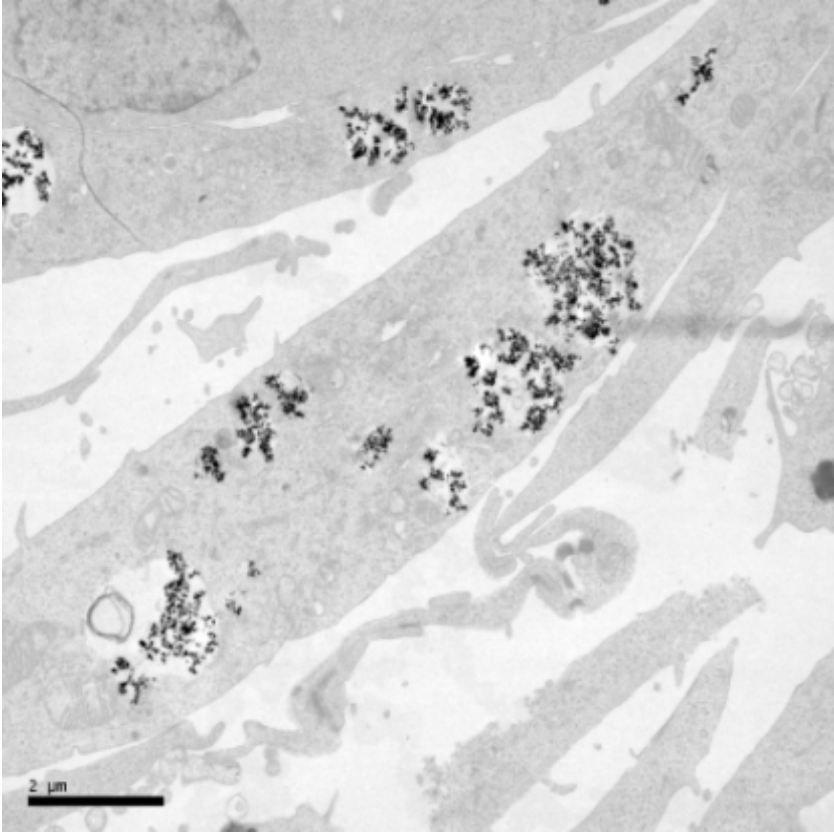

**Transmission electron micrographs of A549 cells exposed to  $\alpha$ -FeO(OH) nanoparticles for 48 h**

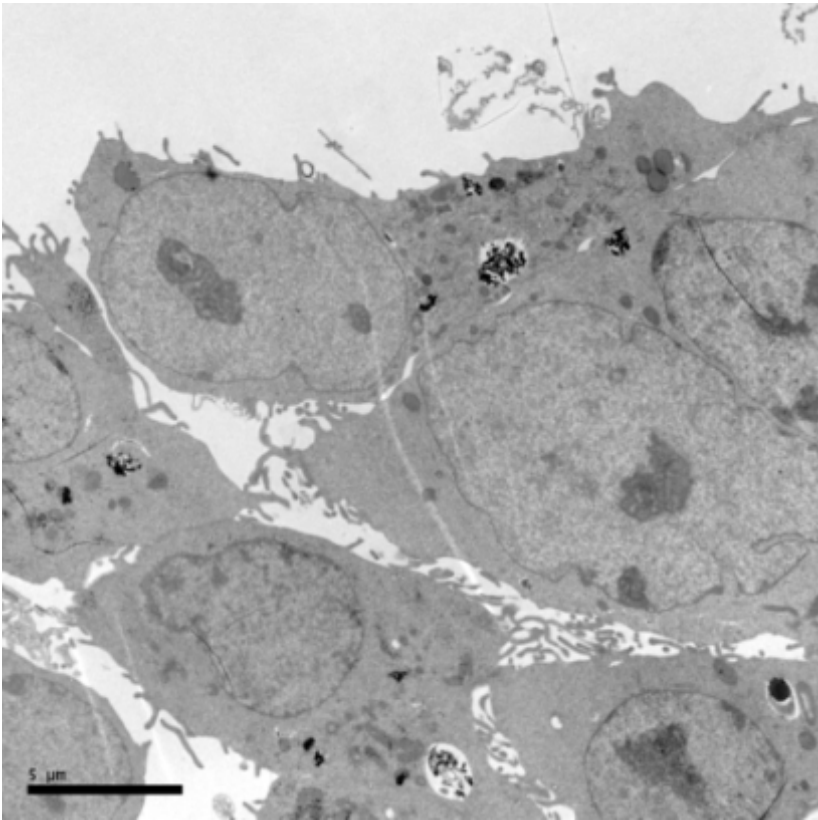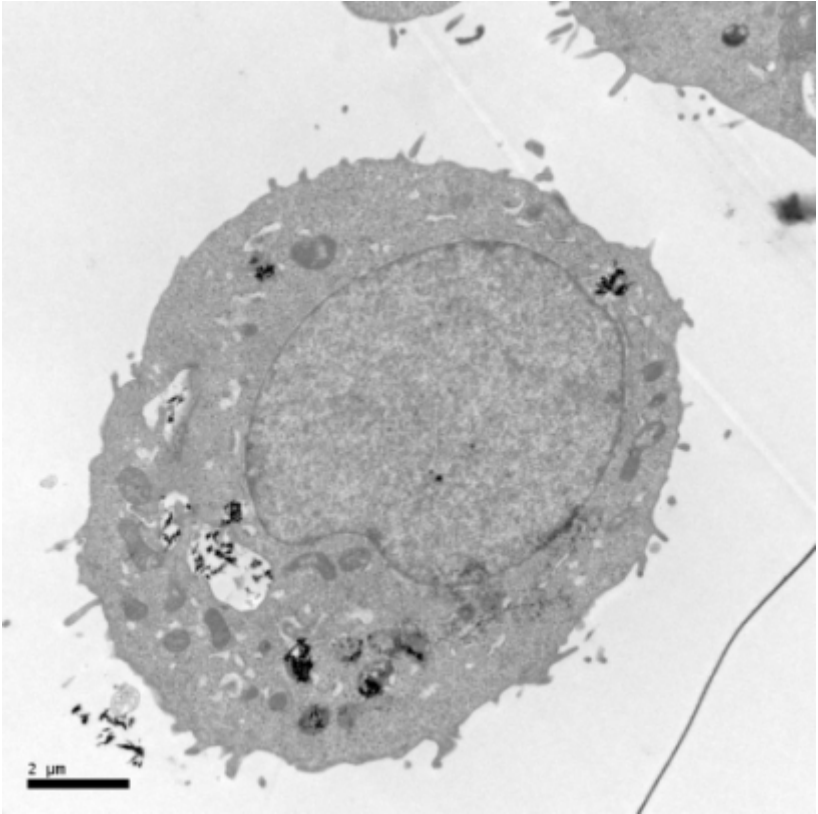

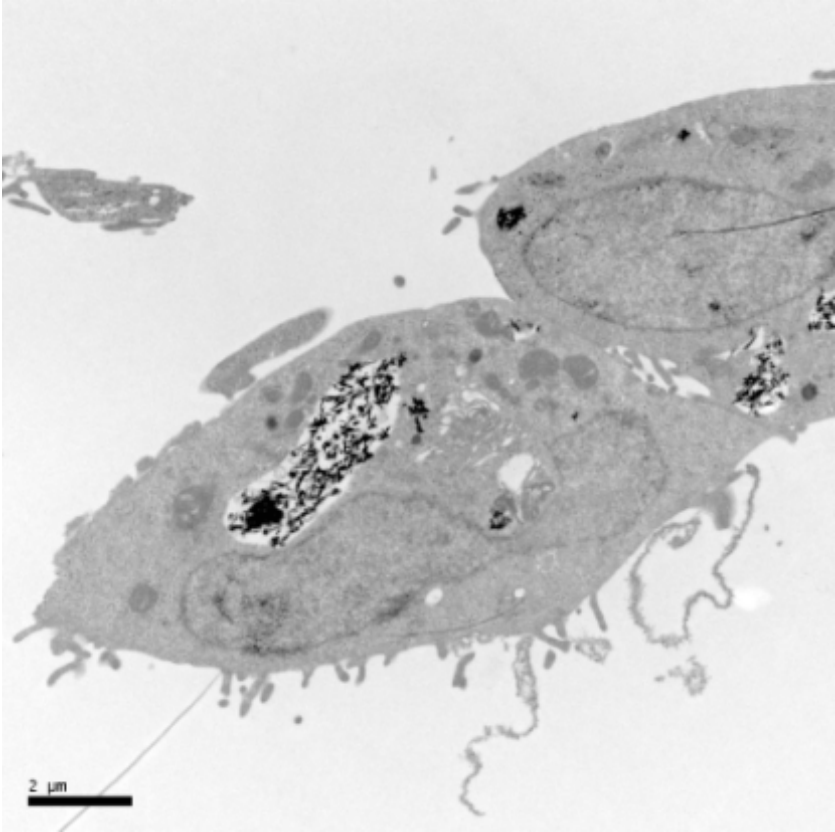

**Transmission electron micrographs of A549 cells exposed to TiO<sub>2</sub> and  $\alpha$ -FeO(OH) nanoparticles for 48 h**

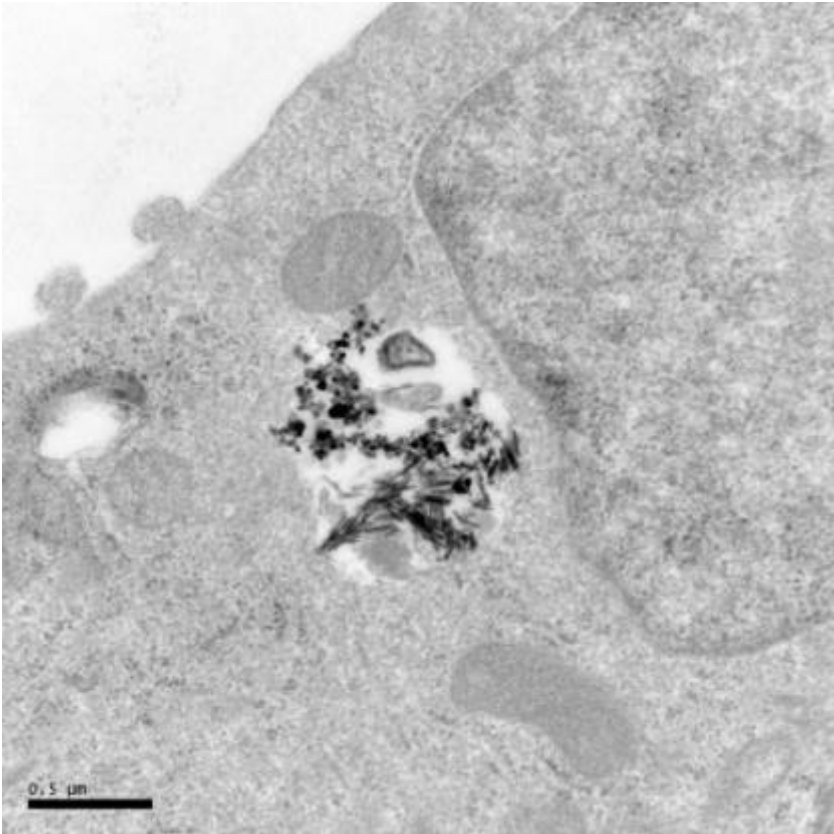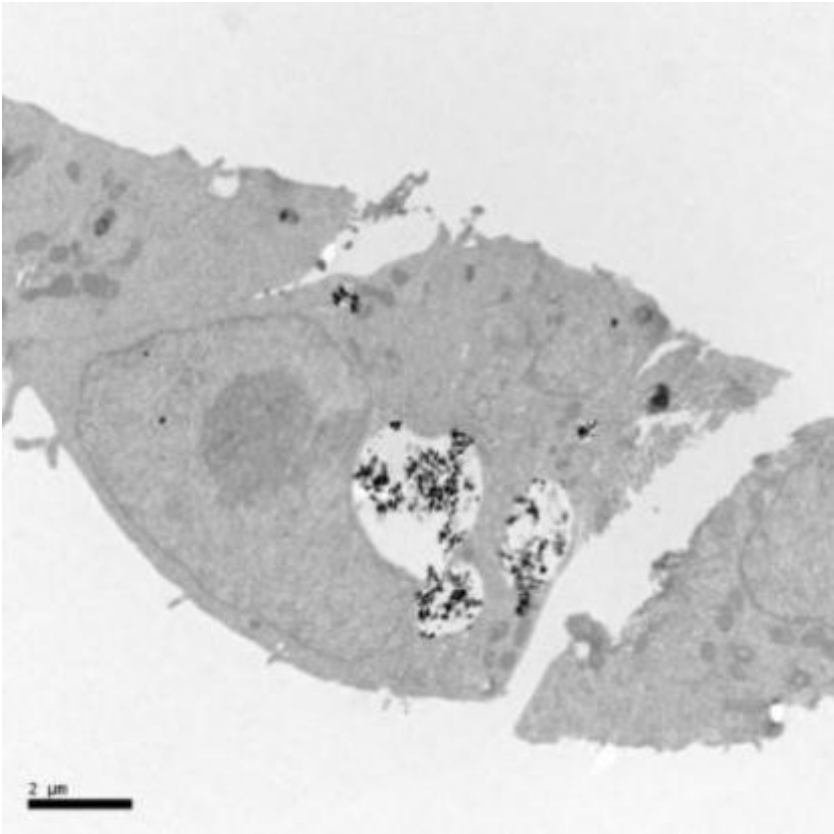

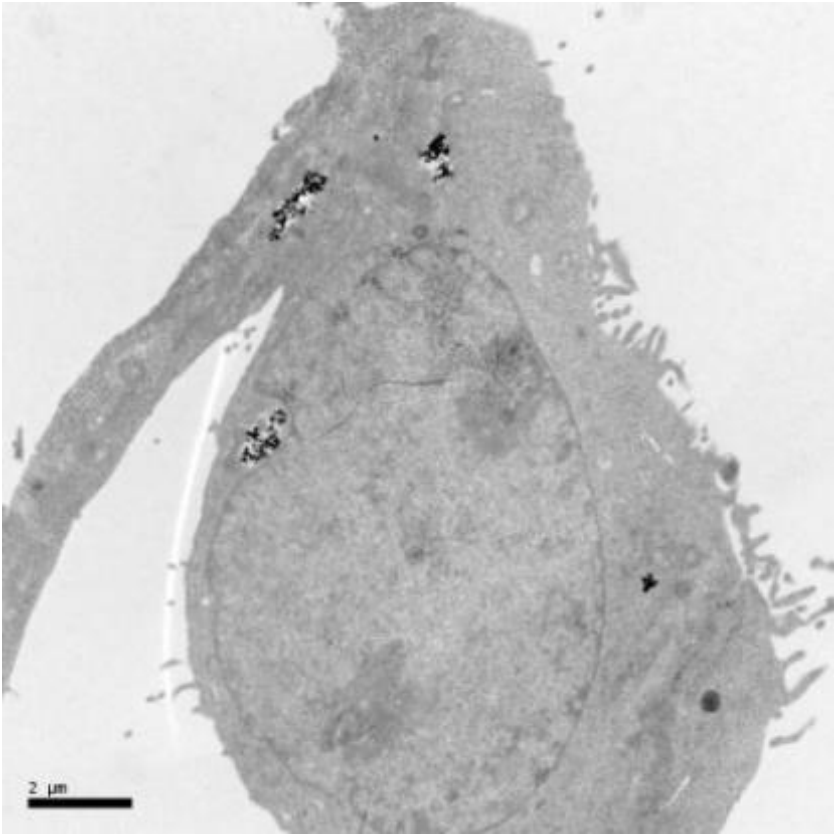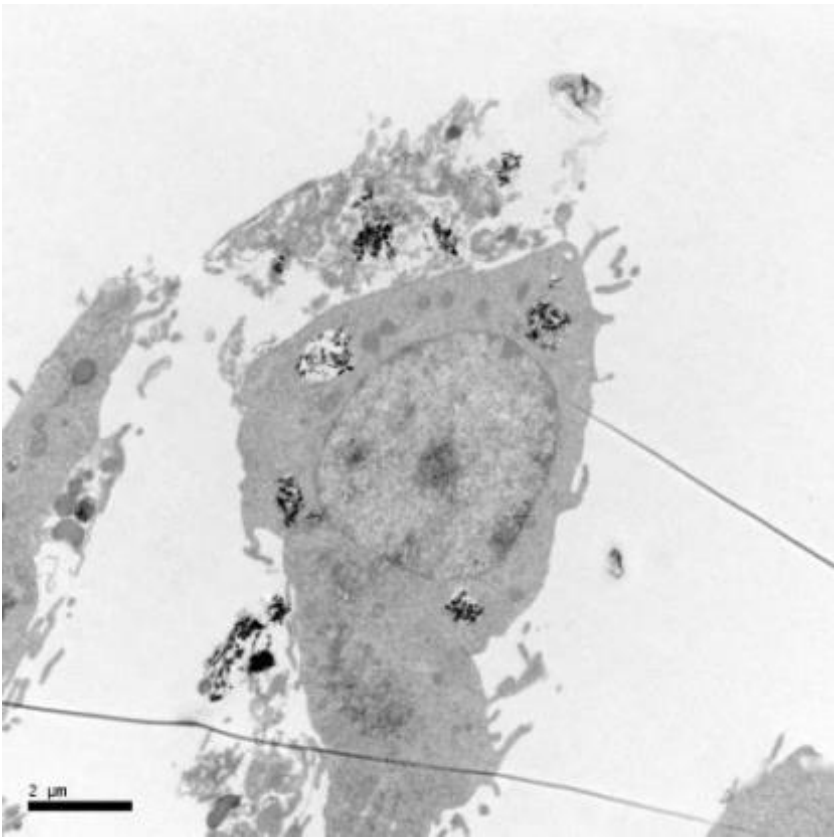

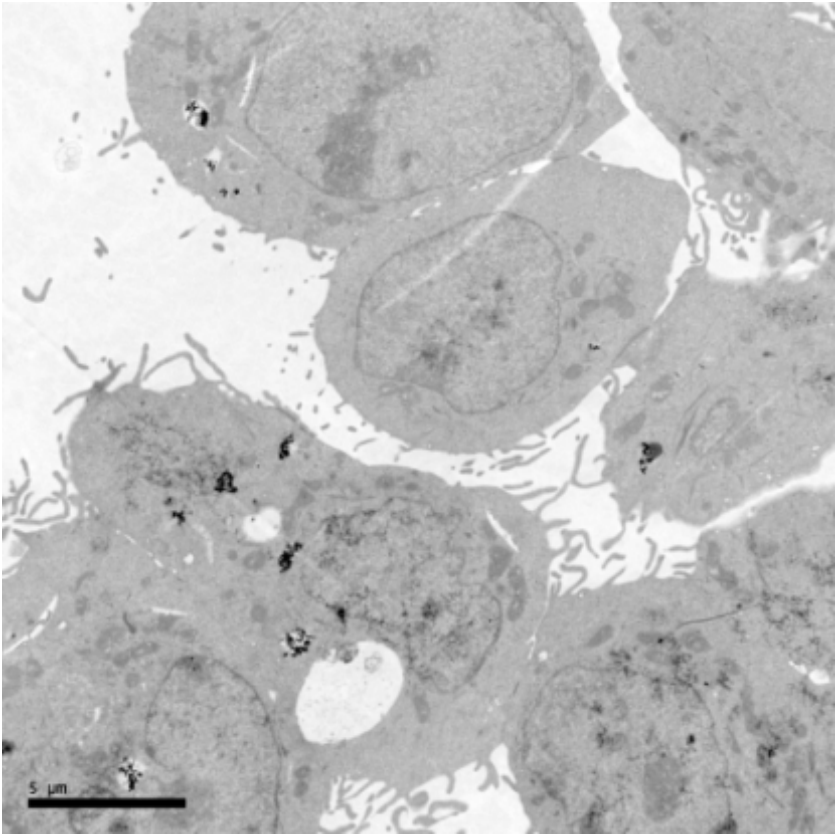

Supplement: mmc1.pdf [file mmc1.pdf]
